# Supplementary material for: Complexes of tubulin oligomers and tau form a viscoelastic intervening network cross-bridging microtubules into bundles
Source: PubMed Central journal article supplement (PMC10943092; doi:10.1038/s41467-024-46438-x), 2024-03-15
Supplement: 41467_2024_46438_MOESM3_ESM.pdf [file 41467_2024_46438_MOESM3_ESM.pdf]

## **Description of Additional Supplementary Files**

**File Name: Supplementary Code 1**

**Description:** Code for modeling of MT bundles and tubulin oligomers.
